# Supplementary material for: Development of a new scoring system to predict 5-year incident diabetes risk in middle-aged and older Chinese
Source: Springer Nature journal article supplement (doi:10.1007/s00592-017-1047-1), 2017-09-16
Supplement: MOESM1 [file 15065374]

**Supplementary Table 1 Risk factors included in the present and previously reported diabetes risk models derived from the prospective studies**

| Diabetes risk model | Risk factors included in the model |
| --- | --- |
| Dongfeng-Tongji cohort study | BMI, fasting glucose, hyperlipidemia, hypertension, current smoking status, and family history of diabetes |
| the Atherosclerosis Risk in Communities (ARIC) study | height, waist circumference, black race/ethnicity, systolic blood pressure, fasting glucose, HDL cholesterol, triglycerides, and a parental history of diabetes |
| the San Antonio Heart Study | age, sex, Mexican-American ethnicity, fasting glucose, systolic blood pressure, HDL cholesterol, body mass index, and family history of diabetes |
| the Framingham Offspring Study | age, total cholesterol, smoking, HDL cholesterol, and systolic blood pressure |
| the India model | age, BMI, waist circumference, family history of diabetes, and physical activity |
| the Thailand model | age, sex, BMI, waist circumference, hypertension, and family history of diabetes, |
